# Supplementary material for: The Modified Response Evaluation Criteria in Solid Tumors (RECIST) Yield a More Accurate Prognoses Than the RECIST 1.1 in Hepatocellular Carcinoma Treated with Transarterial Radioembolization
Source: PubMed Central journal article supplement — Gut Liver. 2020 Feb 14;14(6):765–74. doi: 10.5009/gnl19197 (PMC7667935; doi:10.5009/gnl19197), 2020-02-14
Supplement: GNL-14-765_Supple.pdf [file GNL-14-765_Supple.pdf]

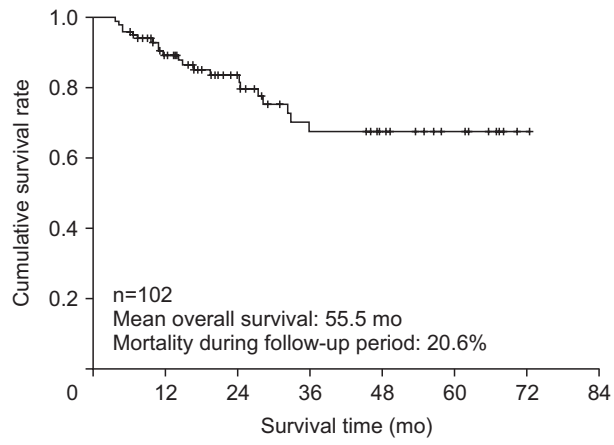

**Supplementary Fig. 1.** Kaplan-Meier analysis for overall survival.

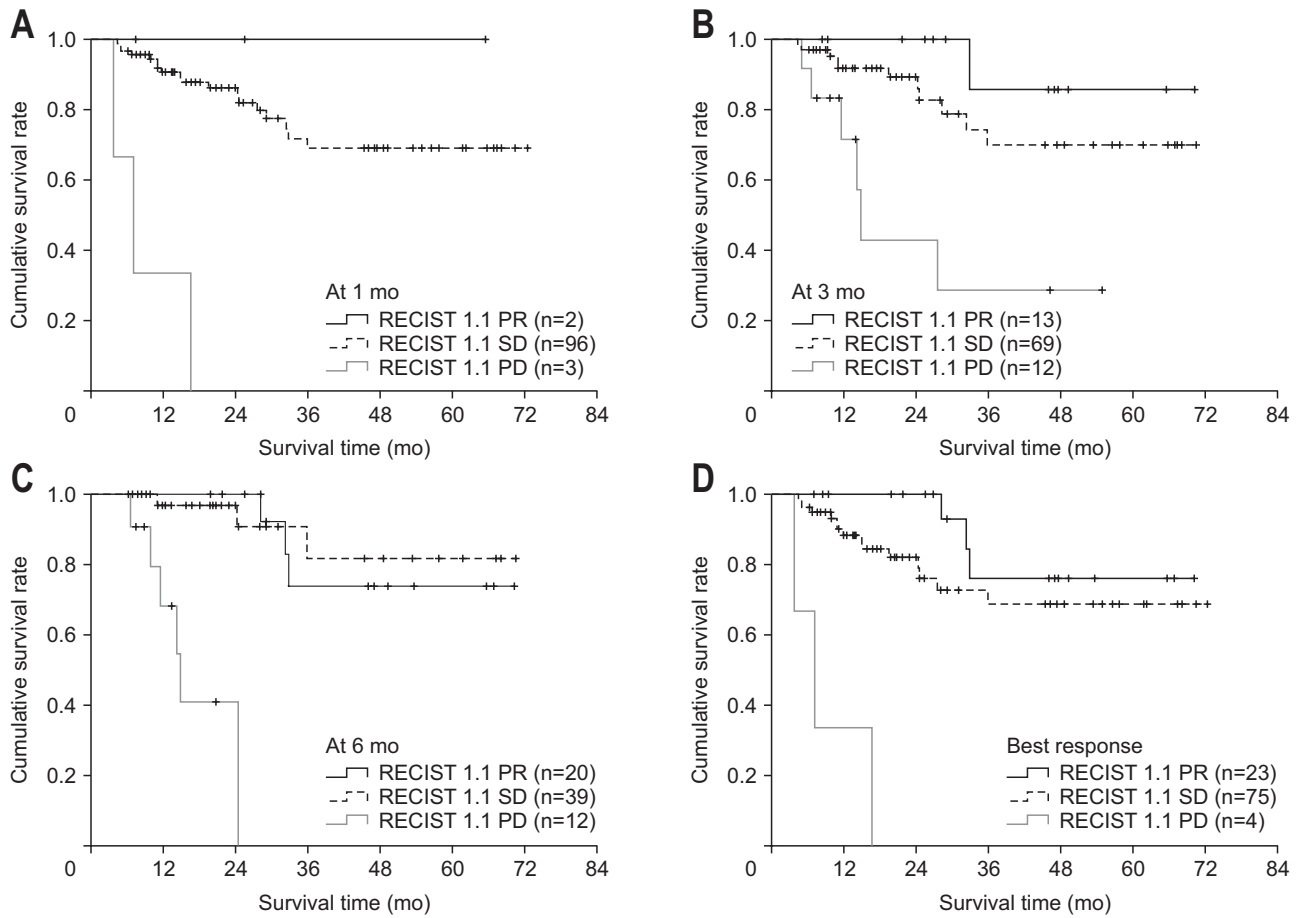

**Supplementary Fig. 2.** Kaplan-Meier curves for overall survival according to the RECIST 1.1 response at 1 month (A), 3 months (B), and 6 months (C) and as the best response (D).  
 RECIST, Response Evaluation Criteria in Solid Tumors; PR, partial response; SD, stable disease; PD, progressive disease.

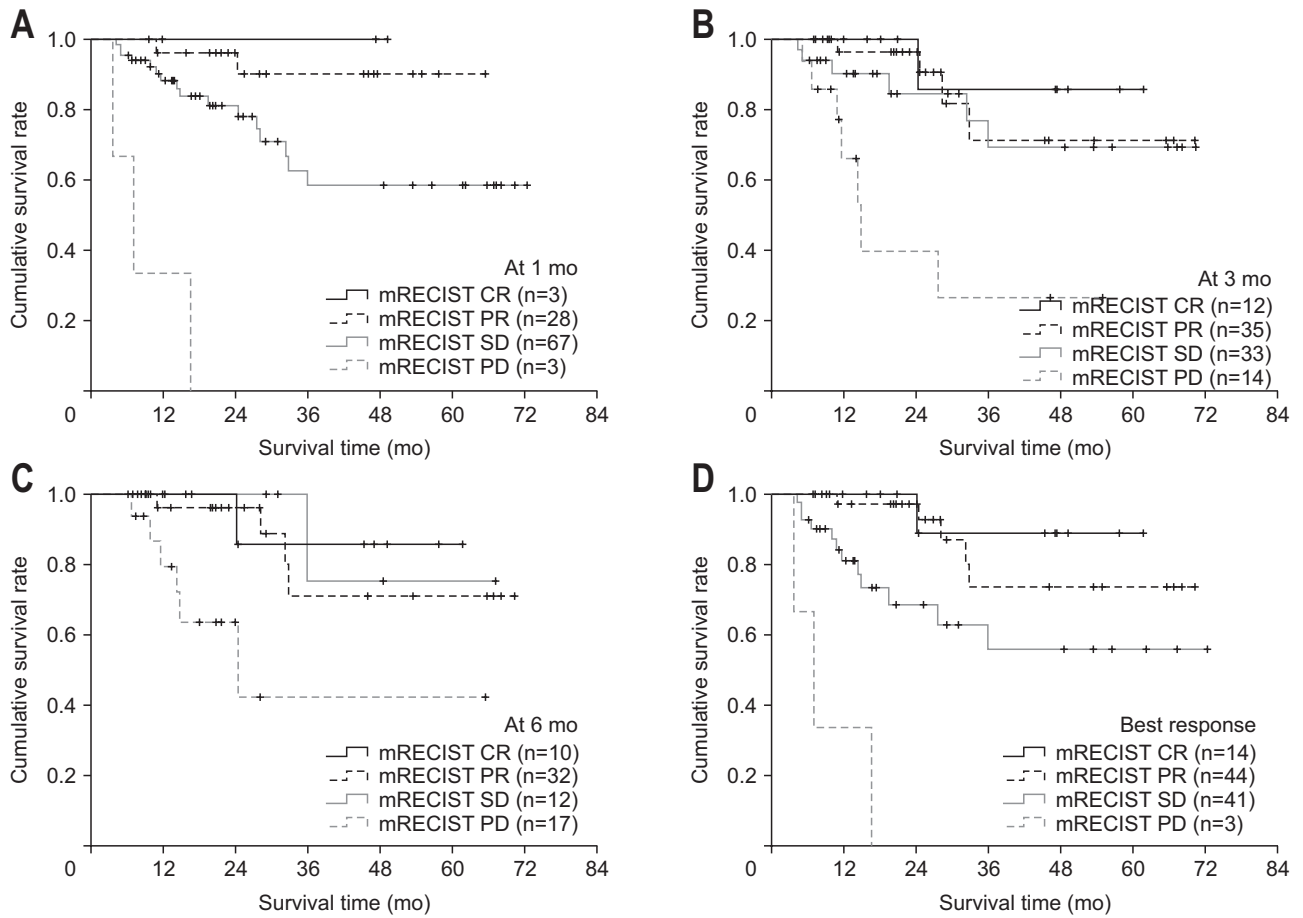

**Supplementary Fig. 3.** Kaplan-Meier curves for overall survival according to the RECIST 1.1 response at 1 month (A), 3 months (B), and 6 months (C) and as the best response (D). mRECIST, modified Response Evaluation Criteria in Solid Tumors; CR, complete response; PR, partial response; SD, stable disease; PD, progressive disease.

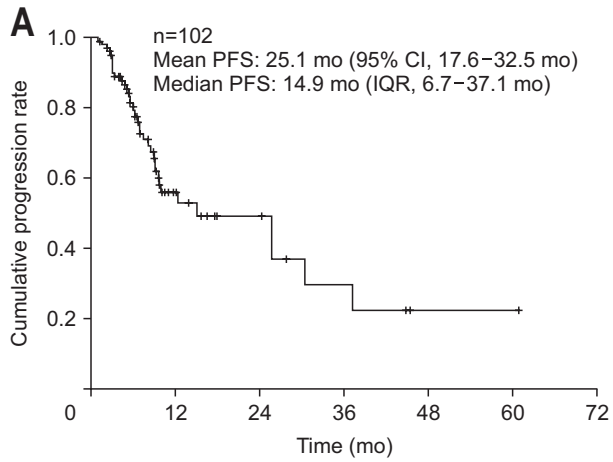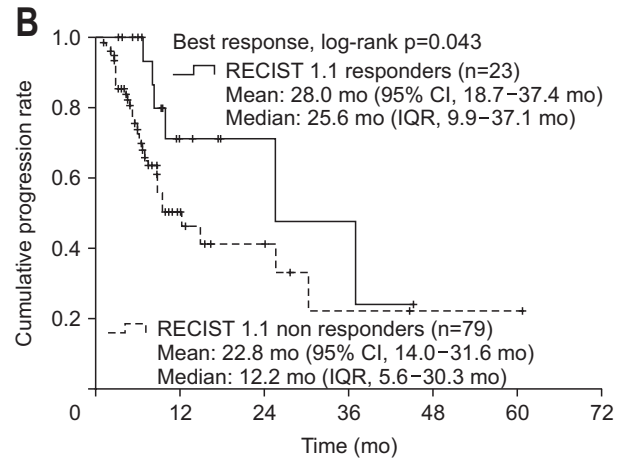

**Supplementary Fig. 4.** Kaplan-Meier analysis for progression-free survival (PFS) of overall patients (A) and comparing responders and non-responders as the best response (B), according to RECIST 1.1.  
 CI, confidence interval; IQR, interquartile range; RECIST, Response Evaluation Criteria in Solid Tumors.

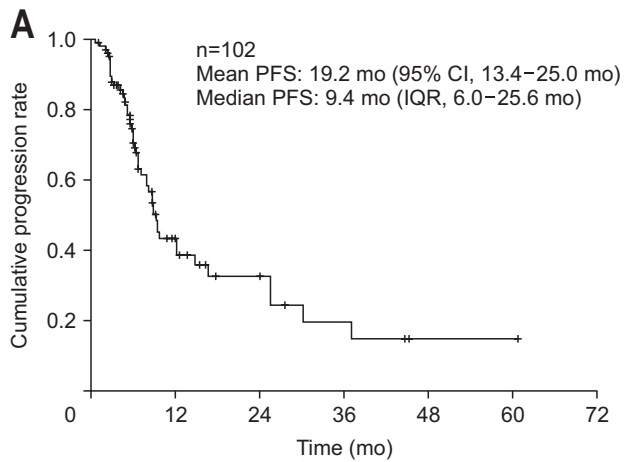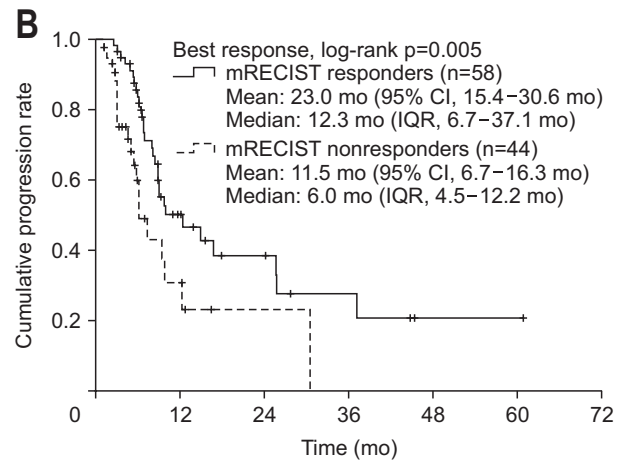

**Supplementary Fig. 5.** Kaplan-Meier analysis for progression-free survival (PFS) of overall patients (A) and comparing responders and nonresponders as the best response (B), according to mRECIST. CI, confidence interval; IQR, interquartile range; mRECIST, modified Response Evaluation Criteria in Solid Tumors.

**Supplementary Table 1.** Response Assessments in RECIST 1.1 and mRECIST

| Category | Target lesions                                                                                                                                                                      |                                                                                                                                                                                                                           |
|----------|-------------------------------------------------------------------------------------------------------------------------------------------------------------------------------------|---------------------------------------------------------------------------------------------------------------------------------------------------------------------------------------------------------------------------|
|          | RECIST 1.1                                                                                                                                                                          | Modified RECIST                                                                                                                                                                                                           |
| CR       | Disappearance of all target lesions                                                                                                                                                 | Disappearance of any intratumoral arterial enhancement in all target lesions                                                                                                                                              |
| PR       | At least a 30% decrease in the sum of diameters of target lesions, taking as reference the baseline sum of the diameters of target lesions                                          | At least a 30% decrease in the sum of diameters of viable (enhancement in the arterial phase) target lesions, taking as reference the baseline sum of the diameters of target lesions                                     |
| SD       | Any cases that do not qualify for either PR or PD                                                                                                                                   | Any cases that do not qualify for either PR or PD                                                                                                                                                                         |
| PD       | An increase of at least 20% in the sum of the diameters of target lesions, taking as reference the smallest sum of the diameters of target lesions recorded since treatment started | An increase of at least 20% in the sum of the diameters of viable (enhancing) target lesions, taking as reference the smallest sum of the diameters of viable (enhancing) target lesions recorded since treatment started |

  

| Category | Non-target lesions                                                                                  |                                                                                                     |
|----------|-----------------------------------------------------------------------------------------------------|-----------------------------------------------------------------------------------------------------|
|          | RECIST 1.1                                                                                          | Modified RECIST                                                                                     |
| CR       | Disappearance of all non-target lesions                                                             | Disappearance of any intratumoral arterial enhancement in all non-target lesions                    |
| IR&SD    | Persistence of one or more non-target lesions                                                       | Persistence of intratumoral arterial enhancement in one or more non-target lesions                  |
| PD       | Appearance of one or more new lesions and/or unequivocal progression of existing non-target lesions | Appearance of one or more new lesions and/or unequivocal progression of existing non-target lesions |

  

| mRECIST recommendations      |                                                                                                                                                                                                                                                 |
|------------------------------|-------------------------------------------------------------------------------------------------------------------------------------------------------------------------------------------------------------------------------------------------|
| Pleural effusion and ascites | Cytopathologic confirmation of the neoplastic nature of any effusion that appears or worsens during treatment is required to declare PD.                                                                                                        |
| Portal hepatis lymph node    | Lymph nodes detected at the porta hepatis can be considered malignant if the lymph node short axis is at least 2 cm.                                                                                                                            |
| Portal vein thrombosis       | Malignant portal vein thrombosis should be considered as a non-measurable lesion and thus included in the non-target lesion group.                                                                                                              |
| New lesion                   | A new lesion can be classified as HCC if its longest diameter is at least 1 cm and the enhancement pattern is typical for HCC. A lesion with atypical radiological pattern can be diagnosed as HCC by evidence of at least 1cm interval growth. |

  

| Overall response assessment |                    |             |                  |
|-----------------------------|--------------------|-------------|------------------|
| Target lesions              | Non-target lesions | New lesions | Overall response |
| CR                          | CR                 | No          | CR               |
| CR                          | IR/SD              | No          | PR               |
| PR                          | Non-PD             | No          | PR               |
| SD                          | Non-PD             | No          | SD               |
| PD                          | Any                | Yes or no   | PD               |
| Any                         | PD                 | Yes or no   | PD               |
| Any                         | Any                | Yes         | PD               |

RECIST, Response Evaluation Criteria in Solid Tumors; mRECIST, modified RECIST; CR, complete response; PR, partial response; SD, stable disease; PD, progressive disease; IR, incomplete response; HCC, hepatocellular carcinoma.

**Supplementary Table 2.** Overall Survival According to the RECIST 1.1 and mRECIST Responses

| Time point    | RECIST 1.1 |           |                  |                    | mRECIST  |           |                  |                    |
|---------------|------------|-----------|------------------|--------------------|----------|-----------|------------------|--------------------|
|               | Response   | No. (%)   | Mean OS (95% CI) | p-value (log-rank) | Response | No. (%)   | Mean OS (95% CI) | p-value (log-rank) |
| At 1 month    | CR         | 0         | -                | -                  | CR       | 3 (2.9)   | Not reached      | vs PR<br>0.624     |
|               | PR         | 2 (2.0)   | Not reached      | vs SD<br>0.454     | PR       | 28 (27.5) | 60.9 (54.8-67.0) | vs SD<br>0.278     |
|               | SD         | 96 (94.1) | 56.6 (50.3-62.9) | vs PD<br>0.063     | SD       | 67 (65.7) | 51.3 (42.9-59.7) | vs PD<br>0.036     |
|               | PD         | 3 (2.9)   | 9.1 (1.5-16.7)   | -                  | PD       | 3 (2.9)   | 9.1 (1.5-16.7)   | vs SD<br>0.031     |
| At 3 months   | CR         | 0         | -                | -                  | CR       | 12 (11.8) | 56.3 (46.6-66.0) | vs PD<br><0.001    |
|               | PR         | 13 (12.7) | 64.9 (55.2-74.6) | vs SD<br>0.233     | PR       | 35 (34.3) | 57.8 (47.0-68.6) | vs PD<br><0.001    |
|               | SD         | 69 (67.6) | 56.2 (48.8-63.6) | vs PD<br>0.003     | SD       | 33 (32.4) | 55.7 (45.5-66.0) | vs SD<br>0.531     |
|               | PD         | 12 (11.8) | 26.1 (12.7-39.5) | -                  | PD       | 14 (13.7) | 25.0 (12.4-37.6) | vs PD<br>0.009     |
| At 6 months   | CR         | 0         | -                | -                  | CR       | 10 (9.8)  | 56.3 (46.6-66.0) | -                  |
|               | PR         | 20 (19.6) | 60.0 (50.1-70.0) | vs SD<br>0.844     | PR       | 32 (31.4) | 58.3 (48.0-68.6) | vs PR<br>0.606     |
|               | SD         | 39 (38.2) | 62.7 (54.5-71.0) | vs PD<br><0.001    | SD       | 12 (11.8) | 59.4 (46.1-72.7) | vs SD<br>0.894     |
|               | PD         | 12 (11.8) | 17.0 (12.1-21.8) | -                  | PD       | 17 (16.7) | 37.1 (19.8-54.5) | vs PD<br>0.051     |
| Best response | CR         | 0         | -                | -                  | CR       | 14 (13.7) | 57.5 (49.8-65.2) | vs SD<br>0.613     |
|               | PR         | 23 (22.5) | 60.9 (51.6-70.2) | vs SD<br>0.188     | PR       | 44 (43.1) | 59.2 (50.5-67.9) | vs PD<br>0.004     |
|               | SD         | 75 (73.5) | 55.4 (48.0-62.9) | vs PD<br><0.001    | SD       | 41 (40.2) | 48.0 (37.0-59.0) | vs PD<br>0.030     |
|               | PD         | 4 (3.9)   | 6.1 (4.2-7.9)    | -                  | PD       | 3 (2.9)   | 9.1 (1.5-16.7)   | -                  |

RECIST, Response Evaluation Criteria in Solid Tumors; mRECIST, modified RECIST; OS, overall survival; CI, confidential interval; CR, complete response; PR, partial response; SD, stable disease; PD, progressive disease.

**Supplementary Table 3.** Causes of Progressive Disease by the RECIST 1.1 and mRECIST Criteria

| Criteria   | Time point | Local progression | Intrahepatic progression | Extrahepatic progression | Total patient |
|------------|------------|-------------------|--------------------------|--------------------------|---------------|
| RECIST 1.1 | 1 Month    | -                 | 3 (100.0)                | -                        | 3             |
|            | 3 Months   | -                 | 10 (83.3)                | 2 (16.7)                 | 12            |
|            | 6 Months   | -                 | 9 (75.0)                 | 3 (25.0)                 | 12            |
| mRECIST    | 1 Month    | -                 | 3 (100.0)                | -                        | 3             |
|            | 3 Months   | -                 | 13 (92.9)                | 1 (7.1)                  | 14            |
|            | 6 Months   | 2 (11.8)          | 11 (64.7)                | 4 (23.5)                 | 17            |

Data are presented as number (%) number.

RECIST, Response Evaluation Criteria in Solid Tumors; mRECIST, modified RECIST.



**Supplementary Table 4.** Univariate Cox Proportional Analysis for Overall Survival

| Variable                                    | Univariate analysis |                        |
|---------------------------------------------|---------------------|------------------------|
|                                             | p-value             | HR (95% CI)            |
| Age                                         | 0.549               | 0.990 (0.956–1.024)    |
| Age >70 yr                                  | 0.178               | 0.430 (0.126–1.470)    |
| Male sex                                    | 0.860               | 1.103 (0.371–3.282)    |
| Administered <sup>90</sup> Y activity, GBq  | 0.726               | 1.067 (0.743–1.533)    |
| Sorafenib use after TARE                    | 0.024               | 2.711 (1.142–6.439)    |
| Diabetes mellitus                           | 0.720               | 1.172 (0.493–2.787)    |
| Hypertension                                | 0.406               | 1.470 (0.593–3.644)    |
| Body mass index                             | 0.123               | 1.093 (0.976–1.123)    |
| >25 kg/m <sup>2</sup> (obesity)             | 0.368               | 1.482 (0.629–3.493)    |
| <17 kg/m <sup>2</sup> (low body mass index) | 0.795               | 0.048 (too wide)       |
| Viral etiology                              | 0.950               | 0.968 (0.349–2.685)    |
| Hepatitis B                                 | 0.946               | 1.034 (0.394–2.710)    |
| Hepatitis C                                 | 0.924               | 0.906 (0.121–6.764)    |
| Heavy alcohol intake                        | 0.858               | 0.832 (0.110–6.262)    |
| Liver cirrhosis                             | 0.720               | 0.832 (0.305–2.273)    |
| Platelet, ×10 <sup>9</sup> /L               | 0.465               | 1.002 (0.997–1.006)    |
| Serum albumin                               | 0.001               | 0.241 (0.101–0.571)    |
| <3.5 g/dL                                   | 0.015               | 2.939 (1.232–7.011)    |
| <2.8 g/dL                                   | <0.001              | 23.186 (4.162–129.167) |
| Total bilirubin, mg/dL                      | 0.094               | 1.758 (0.908–3.406)    |
| Serum aspartate aminotransferase, IU/L      | 0.123               | 1.007 (0.998–1.016)    |
| Serum alanine aminotransferase, IU/L        | 0.976               | 1.000 (0.981–1.019)    |
| Prothrombin time, INR                       | 0.376               | 5.969 (0.115–310.877)  |
| Baseline alpha-fetoprotein, ng/mL           | 0.539               | 1.000 (1.000–1.000)    |
| Baseline DCP                                | 0.003               | 1.000 (1.000–1.000)    |
| DCP >13,000 mAU/mL                          | 0.016               | 3.067 (1.232–7.634)    |
| Infiltrative tumor                          | 0.053               | 2.453 (0.987–6.099)    |
| Tumor number                                | 0.012               | 1.791 (1.137–2.821)    |
| Multiple tumor                              | 0.036               | 2.526 (1.064–5.999)    |
| Tumors above 3                              | 0.007               | 3.259 (1.382–7.687)    |
| Maximal tumor size (continuous)             | 0.040               | 1.140 (1.006–1.291)    |
| >11 cm                                      | 0.039               | 2.644 (1.050–6.659)    |
| Tumor burden >50%                           | 0.019               | 3.342 (1.216–9.184)    |
| Multilobar distribution                     | 0.011               | 3.025 (1.285–7.126)    |
| Portal vein thrombosis                      | 0.014               | 3.028 (1.250–7.332)    |
| First branch                                | 0.005               | 4.796 (1.601–14.364)   |
| Hepatic vein invasion                       | 0.002               | 5.787 (1.916–17.484)   |

HR, hazard ratio; CI, confidence interval; <sup>90</sup>Y, yttrium 90; TARE, transarterial radioembolization; INR, international normalized ratio; DCP, des-gamma-carboxyprothrombin.

**Supplementary Table 5.** Multivariate Cox Proportional Hazard Analysis for Overall Survival

| Variable                                  | p-value | HR (95% CI)           |
|-------------------------------------------|---------|-----------------------|
| Albumin <3.5 g/dL                         | 0.116   | 2.134 (0.830–5.487)   |
| DCP >13,000 mAU/mL                        | 0.838   | 0.855 (0.191–3.820)   |
| Infiltrative type of tumor                | 0.635   | 1.487 (0.288–7.680)   |
| Maximal tumor size >11 cm                 | 0.748   | 0.755 (0.136–4.193)   |
| Multiple tumors                           | 0.525   | 1.442 (0.466–4.467)   |
| Bilobar distribution of tumors            | 0.007   | 3.722 (1.433–9.669)   |
| Tumor burden >50%                         | 0.236   | 2.028 (0.629–6.537)   |
| First branch portal vein tumor thrombosis | 0.011   | 4.998 (1.449–17.237)  |
| Hepatic vein invasion                     | <0.001  | 10.536 (2.995–37.062) |
| Sorafenib after TARE                      | 0.213   | 1.936 (0.685–5.475)   |
| Nonresponders (best response) by mRECIST  | 0.015   | 3.432 (1.272–9.259)   |

HR, hazard ratio; CI, confidence interval; DCP, des-gamma-carboxyprothrombin; TARE, transarterial radioembolization; mRECIST, modified Response Evaluation Criteria in Solid Tumors.

**Supplementary Table 6.** Cox Univariate Proportional Analysis for Progression-Free Survival by the mRECIST

| Variable                                   | Univariate analysis |                        |
|--------------------------------------------|---------------------|------------------------|
|                                            | p-value             | HR (95% CI)            |
| Age                                        | 0.266               | 0.987 (0.965–1.010)    |
| Age >70 yr                                 | 0.386               | 0.775 (0.436–1.379)    |
| Male sex                                   | 0.715               | 1.138 (0.568–2.279)    |
| Administered <sup>90</sup> Y activity, GBq | 0.804               | 0.969 (0.756–1.243)    |
| Diabetes mellitus                          | 0.778               | 0.923 (0.527–1.615)    |
| Hypertension                               | 0.666               | 0.884 (0.504–1.549)    |
| Body mass index                            | 0.223               | 0.945 (0.863–1.035)    |
| >25 kg/m <sup>2</sup> (obesity)            | 0.785               | 0.878 (0.346–2.230)    |
| Viral etiology                             | 0.490               | 1.251 (0.662–2.362)    |
| Hepatitis B                                | 0.825               | 1.068 (0.596–1.914)    |
| Hepatitis C                                | 0.314               | 1.613 (0.636–4.088)    |
| Heavy alcohol intake                       | 0.203               | 0.398 (0.096–1.643)    |
| Liver cirrhosis                            | 0.695               | 0.885 (0.480–1.631)    |
| Platelet, ×10 <sup>9</sup> /L              | 0.671               | 1.001 (0.998–1.004)    |
| Serum albumin                              | 0.021               | 0.488 (0.266–0.895)    |
| Albumin <3.5 g/dL                          | 0.213               | 1.499 (0.792–2.836)    |
| Albumin <2.8 g/dL                          | 0.001               | 12.051 (2.665–54.494)  |
| Total bilirubin, mg/dL                     | 0.161               | 1.511 (0.848–2.691)    |
| Serum aspartate aminotransferase, IU/L     | 0.014               | 1.010 (1.002–1.018)    |
| Serum alanine aminotransferase, IU/L       | 0.141               | 1.009 (0.997–1.020)    |
| Serum alkaline phosphatase, IU/L           | 0.082               | 1.003 (1.000–1.007)    |
| Prothrombin time, INR                      | 0.014               | 31.420 (2.008–491.766) |
| Baseline alpha-fetoprotein, ng/mL          | 0.395               | 1.000 (1.000–1.000)    |
| Baseline DCP, mAU/mL                       | 0.130               | 1.000 (1.000–1.000)    |
| Infiltrative tumor                         | 0.021               | 2.216 (1.127–4.358)    |
| Multiple tumor                             | 0.656               | 1.143 (0.634–2.061)    |
| Tumors above 3                             | 0.300               | 1.409 (0.737–2.694)    |
| Maximal tumor size                         | 0.327               | 1.051 (0.951–1.1620)   |
| >11 cm                                     | 0.621               | 1.215 (0.561–2.633)    |
| Tumor burden >50%                          | 0.812               | 1.153 (0.355–3.740)    |
| Multilobar distribution                    | 0.452               | 1.302 (0.654–2.590)    |
| Portal vein thrombosis                     | 0.052               | 2.011 (0.994–4.070)    |
| First branch                               | 0.062               | 2.732 (0.950–7.853)    |
| Hepatic vein invasion                      | 0.327               | 1.801 (0.556–5.835)    |
| Nonresponse before progression by mRECIST  | 0.007               | 2.214 (1.245–3.936)    |

mRECIST, modified Response Evaluation Criteria in Solid Tumors; HR, hazard ratio; CI, confidence interval; <sup>90</sup>Y, yttrium 90; INR, international normalized ratio; DCP, des-gamma-carboxyprothrombin.

**Supplementary Table 7.** Cox Multivariate Proportional Analysis for Progression-Free Survival by the mRECIST

| Variable                                  | Univariate<br>p-value | Multivariate analysis |                        |
|-------------------------------------------|-----------------------|-----------------------|------------------------|
|                                           |                       | p-value               | HR (95% CI)            |
| Serum albumin, g/dL                       | 0.021                 | 0.256                 | 0.639 (0.296–1.383)    |
| Serum aspartate aminotransferase, IU/L    | 0.014                 | 0.774                 | 1.001 (0.996–1.005)    |
| Prothrombin time, INR                     | 0.014                 | 0.126                 | 12.430 (0.493–313.640) |
| Infiltrative tumor                        | 0.021                 | 0.091                 | 2.103 (0.889–4.974)    |
| Portal vein thrombosis                    | 0.052                 | 0.532                 | 1.345 (0.531–3.404)    |
| Nonresponse before progression by mRECIST | 0.007                 | 0.014                 | 2.151 (1.168–3.964)    |

mRECIST, modified Response Evaluation Criteria in Solid Tumors; HR, hazard ratio; CI, confidence interval; INR, international normalized ratio.

**Supplementary Table 8.** Cox Univariate Proportional Analysis for Progression-Free Survival by the RECIST

| Variable                                   | Univariate analysis |                         |
|--------------------------------------------|---------------------|-------------------------|
|                                            | p-value             | HR (95% CI)             |
| Age                                        | 0.068               | 0.976 (0.951–1.002)     |
| >70 yr                                     | 0.122               | 0.578 (0.288–1.159)     |
| Male sex                                   | 0.413               | 1.440 (0.601–3.454)     |
| Administered <sup>90</sup> Y activity, GBq | 0.763               | 1.045 (0.786–1.389)     |
| Diabetes mellitus                          | 0.637               | 0.854 (0.445–1.641)     |
| Hypertension                               | 0.124               | 0.605 (0.319–1.148)     |
| Body mass index                            | 0.414               | 0.957 (0.862–1.063)     |
| >25 kg/m <sup>2</sup> (obesity)            | 0.655               | 1.243 (0.479–3.227)     |
| Viral etiology                             | 0.348               | 1.437 (0.674–3.063)     |
| Hepatitis B                                | 0.279               | 1.483 (0.727–3.027)     |
| Hepatitis C                                | 0.830               | 0.855 (0.204–3.577)     |
| Heavy alcohol intake                       | 0.170               | 0.248 (0.034–1.816)     |
| Liver cirrhosis                            | 0.895               | 0.954 (0.476–1.913)     |
| Platelet, ×10 <sup>9</sup> /L              | 0.674               | 1.001 (0.997–1.004)     |
| Serum albumin                              | 0.021               | 0.437 (0.216–0.884)     |
| Albumin <3.5 g/dL                          | 0.273               | 1.507 (0.724–3.135)     |
| Albumin <2.8 g/dL                          | 0.001               | 14.196 (3.064–65.771)   |
| Total bilirubin, mg/dL                     | 0.131               | 1.632 (0.864–3.081)     |
| Serum aspartate aminotransferase, IU/L     | 0.040               | 1.010 (1.000–1.019)     |
| Serum alanine aminotransferase, IU/L       | 0.124               | 1.010 (0.997–1.024)     |
| Serum alkaline phosphatase, IU/L           | 0.018               | 1.005 (1.001–1.008)     |
| Prothrombin time, INR                      | 0.017               | 48.875 (2.032–1175.660) |
| Baseline alpha-fetoprotein, ng/mL          | 0.448               | 1.000 (1.000–1.000)     |
| Baseline DCP, mAU/mL                       | 0.086               | 1.000 (1.000–1.000)     |
| Infiltrative tumor                         | 0.007               | 2.763 (1.320–5.784)     |
| Multiple tumor                             | 0.196               | 1.544 (0.799–2.985)     |
| Tumors above 3                             | 0.054               | 2.014 (0.988–4.104)     |
| Maximal tumor size                         | 0.155               | 1.086 (0.969–1.216)     |
| >11 cm                                     | 0.357               | 1.488 (0.639–3.467)     |
| Tumor burden >50%                          | 0.460               | 1.568 (0.475–5.171)     |
| Multilobar distribution                    | 0.153               | 1.730 (0.816–3.671)     |
| Portal vein thrombosis                     | 0.006               | 2.818 (1.343–5.913)     |
| First branch                               | 0.021               | 3.576 (1.212–10.557)    |
| Hepatic vein invasion                      | 0.723               | 1.296 (0.310–5.427)     |
| Noresponse before progression by RECIST    | 0.050               | 2.399 (0.999–5.760)     |

RECIST, Response Evaluation Criteria in Solid Tumors; HR, hazard ratio; CI, confidence interval; <sup>90</sup>Y, yttrium 90; INR, international normalized ratio; DCP, des-gamma-carboxyprothrombin.

**Supplementary Table 9.** Cox Multivariate Proportional Analysis for Progression-Free Survival by the RECIST

| Variable                                 | Univariate<br>p-value | Multivariate analysis |                         |
|------------------------------------------|-----------------------|-----------------------|-------------------------|
|                                          |                       | p-value               | HR (95% CI)             |
| Serum albumin, g/dL                      | 0.021                 | 0.451                 | 0.716 (0.300–1.706)     |
| Serum alkaline phosphatase, IU/L         | 0.018                 | 0.366                 | 1.002 (0.997–1.007)     |
| Prothrombin time, INR                    | 0.017                 | 0.130                 | 21.968 (0.402–1201.101) |
| Infiltrative tumor                       | 0.007                 | 0.113                 | 2.105 (0.838–5.284)     |
| Portal vein thrombosis                   | 0.006                 | 0.173                 | 2.007 (0.737–5.465)     |
| Nonresponse before progression by RECIST | 0.050                 | 0.126                 | 2.099 (0.811–5.432)     |

RECIST, Response Evaluation Criteria in Solid Tumors; HR, hazard ratio; CI, confidence interval; INR, international normalized ratio.
